# Supplementary material
Source: HighWire-hosted journal article supplement (https://jitc.bmj.com/content/11/10/e007494)

### Supplementary Figure 3

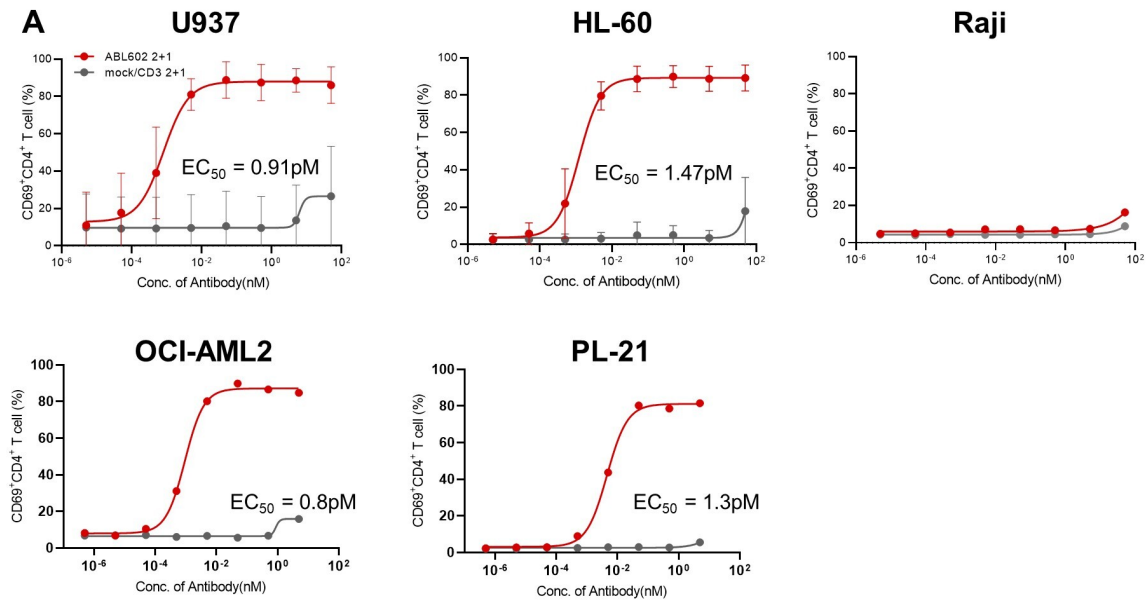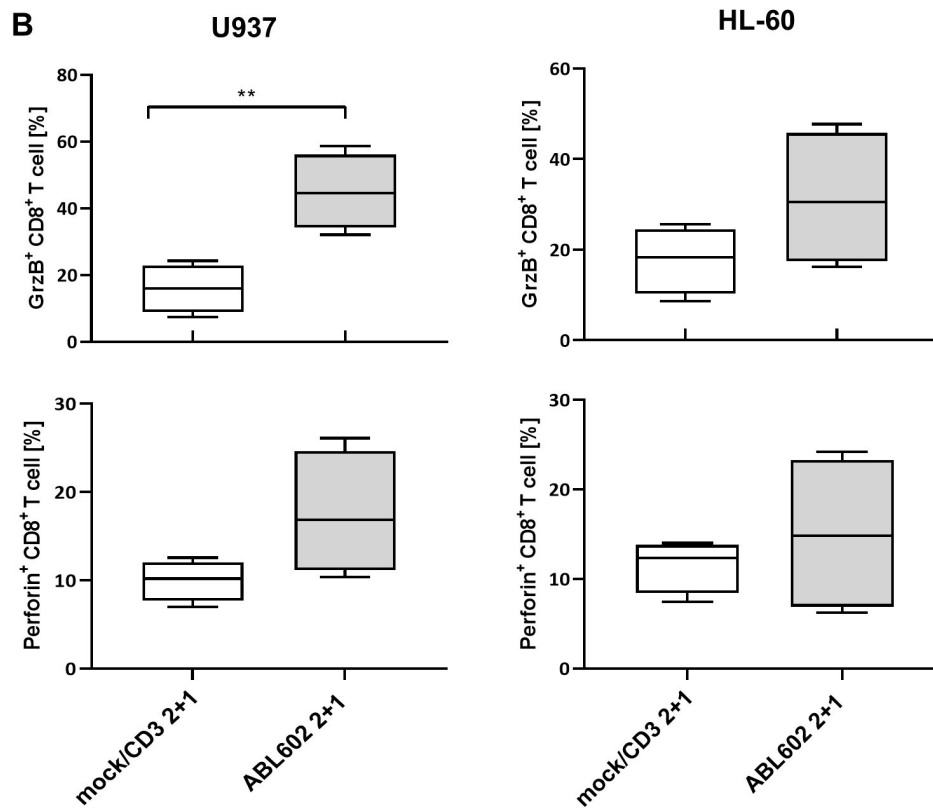

Supplement: inline-supplementary-material-4 [file inline-supplementary-material-4.pdf]

## Supplementary Figure 5

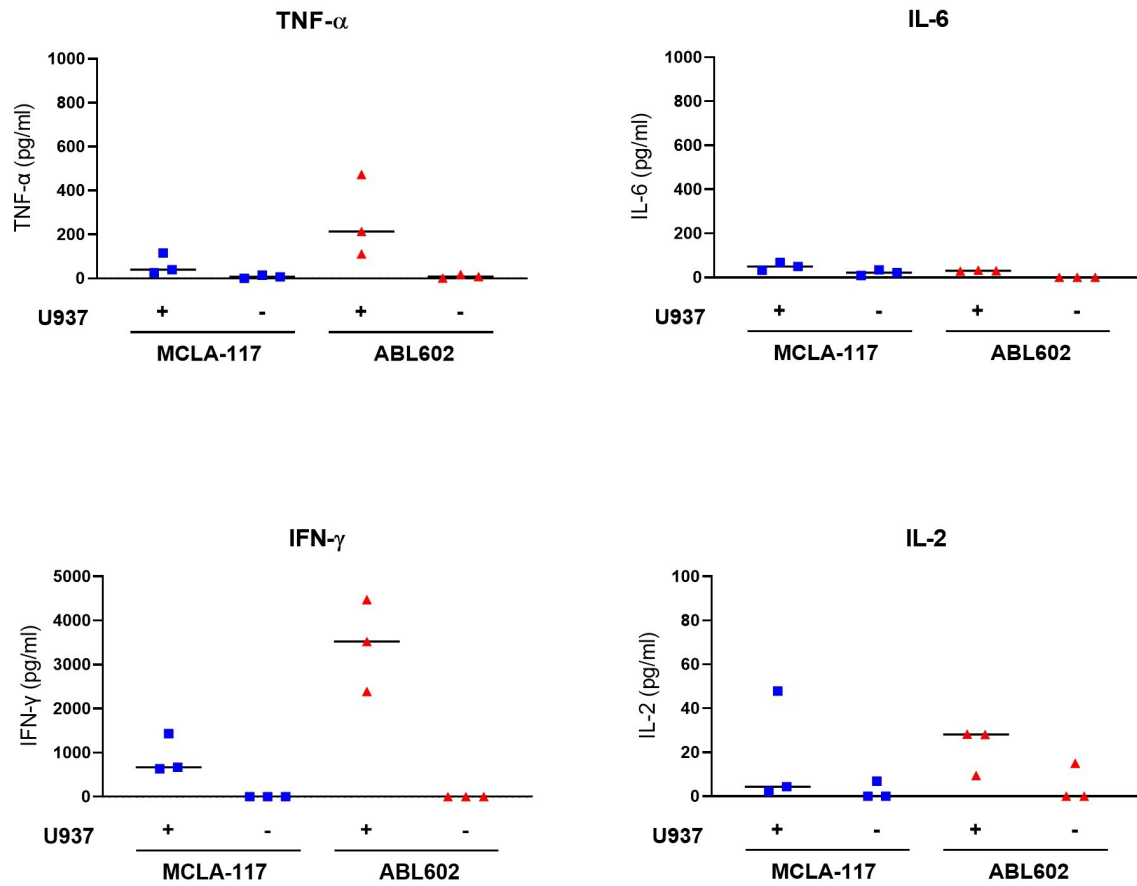

Supplement: inline-supplementary-material-6 [file inline-supplementary-material-6.pdf]
